# Supplementary material for: Fabrication and design of mechanically stable and free-standing polymeric membrane with two-level apertures
Source: Royal Society of Chemistry journal article supplement (doi:10.1039/c8sm01968a), 2018-01-01
Supplement: c8sm01968a1.pdf [file c8sm01968a1.pdf]

# ELECTRONIC SUPPLEMENTARY

## INFORMATION

### **Fabrication and Design of Mechanically Stable and Free-standing Polymeric Membrane with Two-level Apertures**

*Changwook Seol*<sup>1,†</sup>, *Segeun Jang*<sup>2,†</sup>, *Junsoo Kim*<sup>3</sup>, *Tea-Sung Jun*<sup>1</sup> and *Sang Moon Kim*<sup>1\*</sup>

<sup>1</sup> *Department of Mechanical Engineering, Incheon National University, Incheon, 22012, Korea*

<sup>2</sup> *Department of Mechanical Engineering, Hanbat National University, Daejeon, 34158, Korea*

<sup>3</sup> *School of Engineering and Applied Sciences, Harvard University, Cambridge, MA 02138, USA.*

† These authors contributed equally to this work.

\* Corresponding authors: [ksm7852@inu.ac.kr](mailto:ksm7852@inu.ac.kr) (S. M. Kim)

Key words: Multiscale structure, Design rule, UV curable material, Free-standing membrane, Two-level apertures

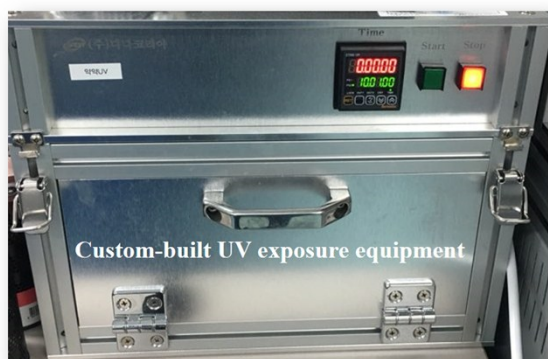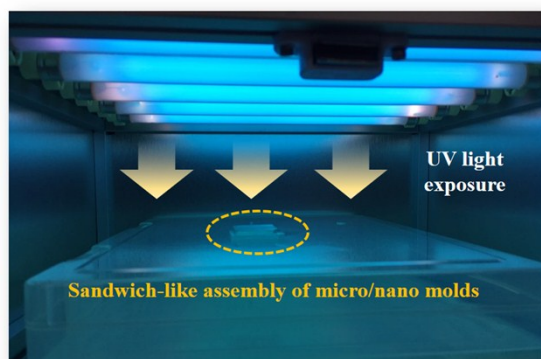

**Figure S1.** Camera image of Custom-built UV exposure equipment and UV exposure process to sandwich-like assembly of micro/nano molds.

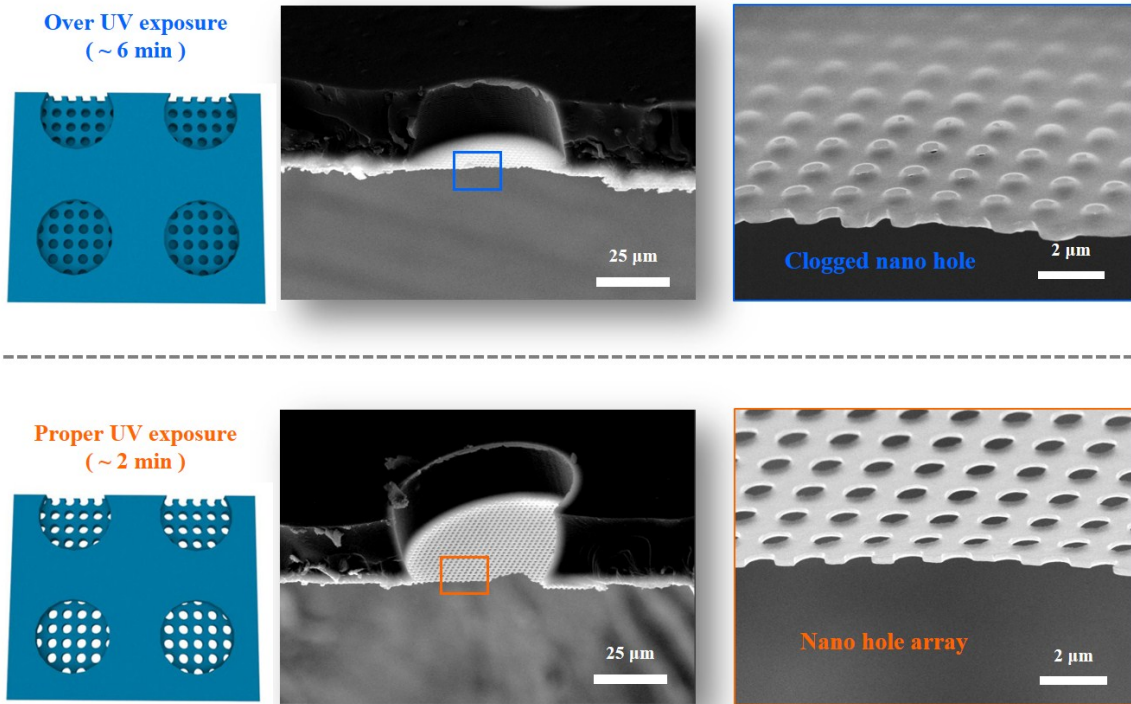

**Figure S2.** SEM images of the fabricated polymeric membrane with two-level apertures with variation of UV light exposure time.

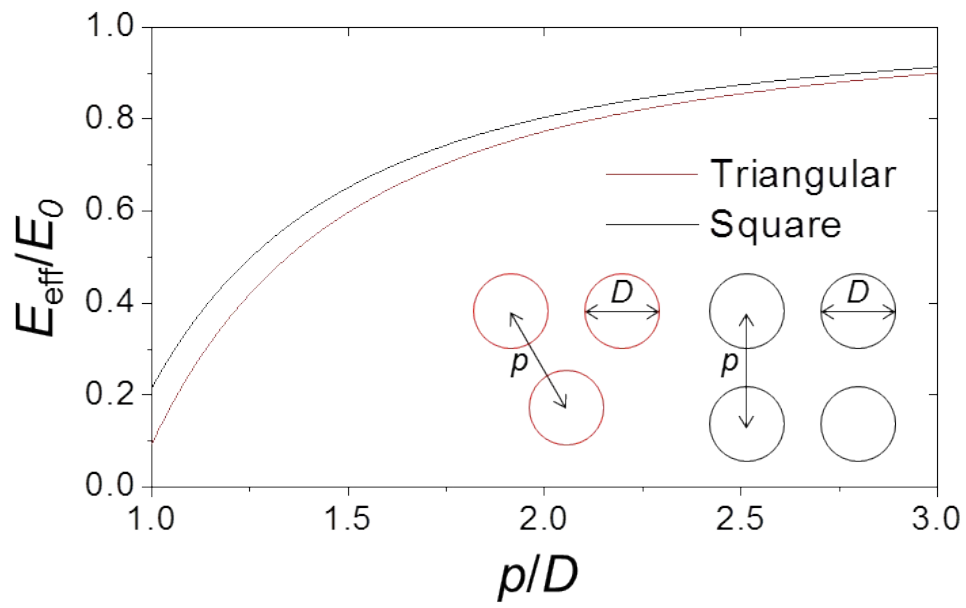

**Figure S3.** Effective Young's modulus of the membrane according to the pitch divided by the diameter of the aperture,  $p/D$ , with two aperture designs, triangular and square

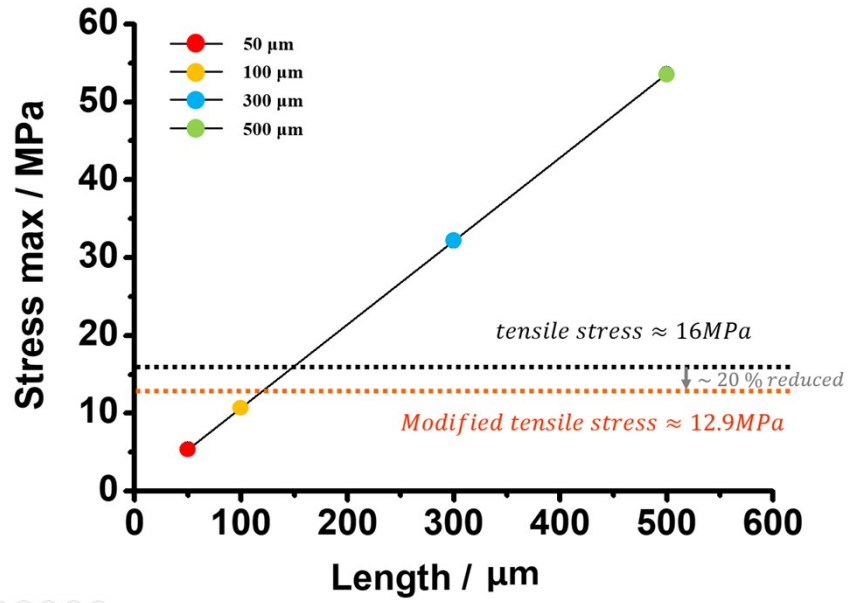

**Figure S4.** Comparison of modified maximum tensile stress and maximum applied stress to the membrane considering the nanoscale structure effect.

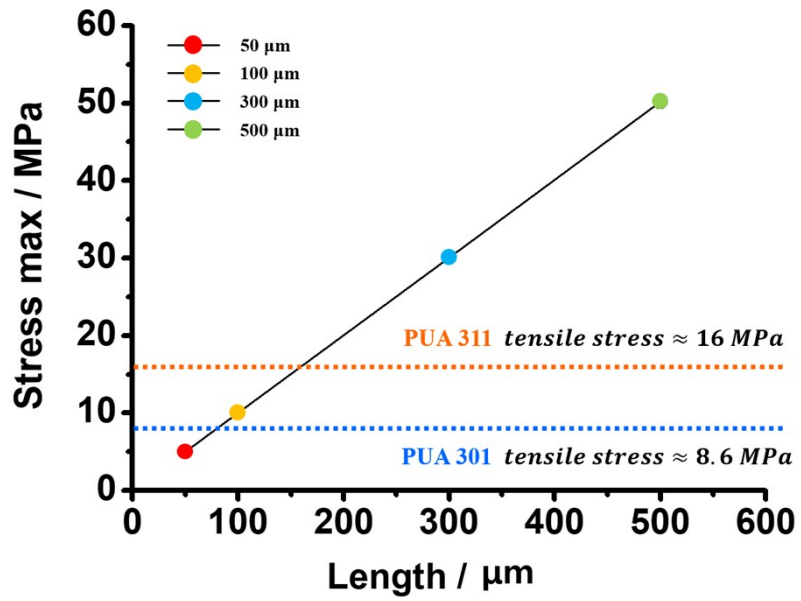

**Figure S5.** The stability criterion for the polymeric nano aperture membrane monolithically constructed on the micro aperture membrane with the material of PUA 301 and PUA 311. Maximum tensile stress – length relationship of four diameters micro PDMS mold.

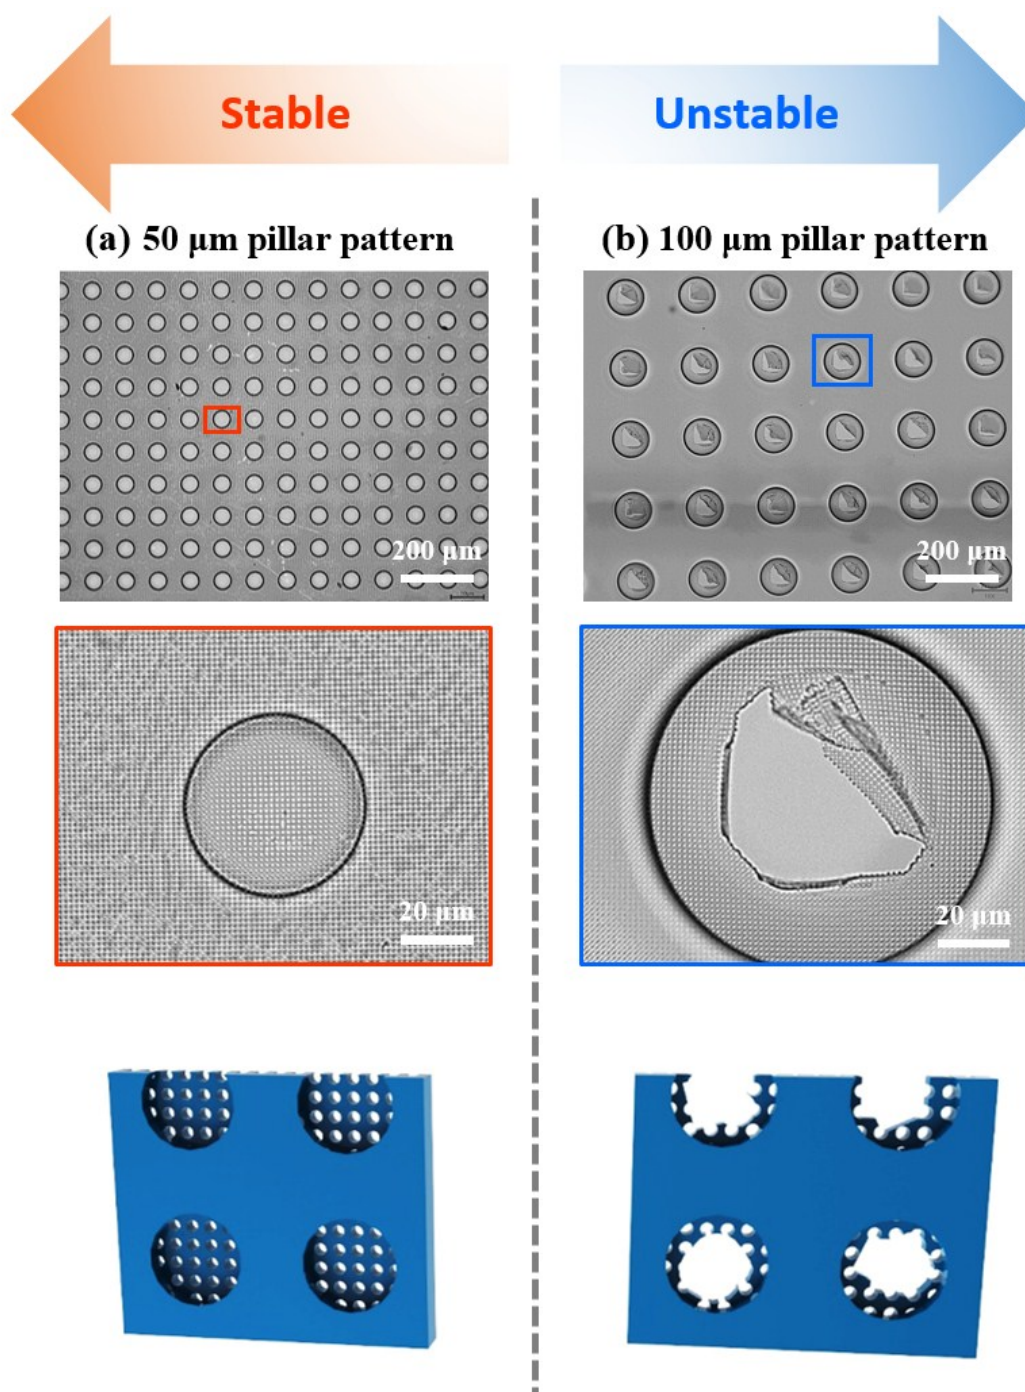

**Figure S6.** Optical microscopic images of polymeric membrane with the material of PUA 301, which consist of 800 nm hole layer and diverse micro hole sized supporting layers (50, 100 μm).

**Table S1.** Surface energy of the materials

| <b>Material</b> | $\gamma^d$<br>[mN/m] | $\gamma^p$<br>[mN/m] | $\gamma (= \gamma^d + \gamma^p)$<br>[mN/m] | $W_{PDMS-PUA311}$<br>[mN/m] |
|-----------------|----------------------|----------------------|--------------------------------------------|-----------------------------|
| PUA 301         | 10.5                 | 8.8                  | 19.3                                       | 32.2                        |
| PDMS            | 21.7                 | 1.1                  | 22.8                                       |                             |

**Table S2.** Maximum applied stress with the variation of diameter of supporting layer

| <b>Material</b> | $\sigma_{\max, 50 \mu\text{m}}$<br>[N/mm] | $\sigma_{\max, 100 \mu\text{m}}$<br>[N/mm] | $\sigma_{\max, 300 \mu\text{m}}$<br>[N/mm] | $\sigma_{\max, 500 \mu\text{m}}$<br>[N/mm] |
|-----------------|-------------------------------------------|--------------------------------------------|--------------------------------------------|--------------------------------------------|
| PUA 301         | 5.0                                       | 10.0                                       | 30.1                                       | 50.2                                       |
| PUA 311         | 5.4                                       | 10.7                                       | 32.2                                       | 53.6                                       |
